# Supplementary material for: In silico-guided sequence modifications of K-ras epitopes improve immunological outcome against G12V and G13D mutant KRAS antigens
Source: PeerJ. 2018 Jul 20;6:e5056. doi: 10.7717/peerj.5056 (PMC6055689; doi:10.7717/peerj.5056)
Supplement: Supplemental Information 9 — All mimotopes and their respective controls were subjected to in vitro assessment of cytokines using cytometric bead array assay. Raw data were displayed as mean values and graphs. [file peerj-06-5056-s009.xlsx]

## Sheet: Mean data
Mimotope	Treatment duration (hours)	Concentration (pg/mL)
		IL-2	IL-12p70	IFN-γ	IL-4	IL-5	IL-10	IL-21	IL-6	TNF
68-V	24	0.25 ± 0.33	1.16 ± 1.21	0.29 ± 0.30	0.27 ± 0.46	0.28 ± 0.25	0.32 ± 0.55	0.32 ± 0.55	0.22 ± 0.39	3.88 ± 3.43
	48	0.14 ± 0.17	0.85 ± 0.74	0.06 ± 0.10	0.32 ± 0.55	0	1.48 ± 2.56	0.98 ± 1.70	0	1.02 ± 1.38
164-D	24	0.56 ± 0.32	1.47 ± 2.55	0.40 ± 0.46	0.60 ± 0.63	0.42 ± 0.40	2.93 ± 0.61	0.51 ± 0.30	0.32 ± 0.56	2.95 ± 1.68
	48	0.11 ± 0.15	0.16 ± 0.27	0.05 ± 0.09	0.14 ± 0.24	0	0.68 ± 1.18	0.54 ± 0.56	0	0.73 ± 0.64
224-D	24	0.06 ± 0.10	0	0	0	0	0.97 ± 1.69	0.89 ± 1.31	1.48 ± 1.31	1.80 ± 3.12
	48	0.34 ± 0.41	3.81 ± 6.16	0.98 ± 1.57	2.46 ± 4.27	1.13 ± 1.96	5.20 ± 7.05	3.69 ± 3.64	2.04 ± 2.59	1.32 ± 2.29
WT	24	0.007 ± 0.012	0.037 ± 0.064	0.003 ± 0.006	0	0	0	0.297 ± 0.290	0.440 ± 0.435	1.530 ± 2.650
	48	0	0	0	0	0	0.790 ± 1.368	0.027 ± 0.046	0	0
G12V	24	0	0	0	0	0	0.320 ± 0.554	0.157 ± 0.271	0.123 ± 0.108	0.793 ± 1.051
	48	0.023 ± 0.040	0	0	0	0	1.313 ± 2.275	0.070 ± 0.121	0	0
G13D	24	0	0.860 ± 1.490	0	0	0	0	0.393 ± 0.681	0.267 ± 0.233	0.630 ± 1.091
	48	0	0	0	0	0	0.320 ± 0.554	0.077 ± 0.133	0	0

## Sheet: WT
	Quantitative Sample Results for WildType
	Analyte Name	CC 24H 1	CC 24H 2	CC 24H 3	Mean 24H	CC 48H 1	CC 48H 2	CC 48H 3	Mean 48H	STD 24H	STD 48H
	Mouse IL-2	0.02	0	0	0.00666667	0	0	0	0	0.011547	0
	Mouse IL-12p70	0.11	0	0	0.0366667	0	0	0	0	0.0635085	0
	Mouse IFN-γ	0.01	0	0	0.00333333	0	0	0	0	0.0057735	0
	Mouse IL-4	0	0	0	0	0	0	0	0	0	0
	Mouse IL-5	0	0	0	0	0	0	0	0	0	0
	Mouse IL-10	0	0	0	0	2.37	0	0	0.79	0	1.36832
	Mouse IL-21	0.58	0.31	0	0.296667	0	0	0.08	0.0266667	0.29023	0.046188
	Mouse IL-6	0.87	0	0.45	0.44	0	0	0	0	0.435086	0
	Mouse TNF	4.59	0	0	1.53	0	0	0	0	2.65004	0
	24H
	48H

## Sheet: G12V
	Quantitative Sample Results for G12V
	Analyte Name	CC 24H 1	CC 24H 2	CC 24H 3	Mean 24H	CC 48H 1	CC 48H 2	CC 48H 3	Mean 48H	STD 24H	STD 48H
	Mouse IL-2	0	0	0	0	0.07	0	0	0.0233333	0	0.0404145
	Mouse IL-12p70	0	0	0	0	0	0	0	0	0	0
	Mouse IFN-γ	0	0	0	0	0	0	0	0	0	0
	Mouse IL-4	0	0	0	0	0	0	0	0	0	0
	Mouse IL-5	0	0	0	0	0	0	0	0	0	0
	Mouse IL-10	0.96	0	0	0.32	3.94	0	0	1.31333	0.554256	2.27476
	Mouse IL-21	0.47	0	0	0.156667	0.21	0	0	0.07	0.271355	0.121244
	Mouse IL-6	0.17	0	0.2	0.123333	0	0	0	0	0.107858	0
	Mouse TNF	2	0.08	0.3	0.793333	0	0	0	0	1.05078	0
	24H
	48H

## Sheet: G13D
	Quantitative Sample Results for G13D
	Analyte Name	CC 24H 1	CC 24H 2	CC 24H 3	Mean 24H	CC 48H 1	CC 48H 2	CC 48H 3	Mean 48H	STD 24H	STD 48H
	Mouse IL-2	0	0	0	0	0	0	0	0	0	0
	Mouse IL-12p70	0	2.58	0	0.86	0	0	0	0	1.48956	0
	Mouse IFN-γ	0	0	0	0	0	0	0	0	0	0
	Mouse IL-4	0	0	0	0	0	0	0	0	0	0
	Mouse IL-5	0	0	0	0	0	0	0	0	0	0
	Mouse IL-10	0	0	0	0	0.96	0	0	0.32	0	0.554256
	Mouse IL-21	1.18	0	0	0.393333	0.23	0	0	0.0766667	0.681273	0.132791
	Mouse IL-6	0.37	0	0.43	0.266667	0	0	0	0	0.232881	0
	Mouse TNF	1.89	0	0	0.63	0	0	0	0	1.09119	0
	24H
	48H

## Sheet: 68V
	Quantitative Sample Results for 68-V
	Analyte Name	CC 24H 1	CC 24H 2	CC 24H 3	Mean 24H	CC 48H 1	CC 48H 2	CC 48H 3	Mean 48H	STD 24H	STD 48H
	IL-2	0.12	0	0.63	0.25	0.09	0.32	0	0.136667	0.334515	0.165025
	IL-12p70	0	1.05	2.42	1.15667	1.34	1.2	0	0.846667	1.21352	0.736569
	IFN-γ	0.28	0	0.59	0.29	0.18	0	0	0.06	0.295127	0.103923
	IL-4	0	0	0.8	0.266667	0.96	0	0	0.32	0.46188	0.554256
	IL-5	0.45	0	0.4	0.283333	0	0	0	0	0.246644	0
	IL-10	0.96	0	0	0.32	4.43	0	0	1.47667	0.554256	2.55766
	IL-21	0.96	0	0	0.32	2.94	0	0	0.98	0.554256	1.69741
	IL-6	0.67	0	0	0.223333	0	0	0	0	0.386825	0
	TNF	6.52	0	5.12	3.88	0	0.47	2.59	1.02	3.43232	1.37982
	24H
	48H

## Sheet: 164D
	Quantitative Sample Results for 164-D
	Analyte Name	CC 24H 1	CC 24H 2	CC 24H 3	Mean 24H	CC 48H 1	CC 48H 2	CC 48H 3	Mean 48H	STD 24H	STD 48H
	IL-2	0.23	0.59	0.86	0.56	0.04	0	0.28	0.106667	0.31607	0.151438
	IL-12p70	0	0	4.42	1.47333	0.47	0	0	0.156667	2.55189	0.271355
	IFN-γ	0	0.31	0.9	0.403333	0	0	0.15	0.05	0.457202	0.0866025
	IL-4	0	0.56	1.25	0.603333	0	0	0.42	0.14	0.626126	0.242487
	IL-5	0	0.45	0.8	0.416667	0	0	0	0	0.40104	0
	IL-10	3.15	2.24	3.39	2.92667	2.05	0	0	0.683333	0.606658	1.18357
	IL-21	0.34	0.34	0.86	0.513333	1.11	0.51	0	0.54	0.300222	0.555608
	IL-6	0.97	0	0	0.323333	0	0	0	0	0.56003	0
	TNF	2	1.96	4.89	2.95	0	0.97	1.22	0.73	1.68021	0.644438
	24H
	48H

## Sheet: 224D
	Quantitative Sample Results for 224-D
	Analyte Name	CC 24H 1	CC 24H 2	CC 24H 3	Mean 24H	CC 48H 1	CC 48H 2	CC 48H 3	Mean 48H	STD 24H	STD 48H
	IL-2	0.17	0	0	0.0566667	0.24	0	0.79	0.343333	0.0981495	0.40501
	IL-12p70	0	0	0	0	0	0.52	10.92	3.81333	0	6.16004
	IFN-γ	0	0	0	0	0.16	0	2.79	0.983333	0	1.56666
	IL-4	0	0	0	0	0	0	7.39	2.46333	0	4.26662
	IL-5	0	0	0	0	0	0	3.39	1.13	0	1.95722
	IL-10	2.92	0	0	0.973333	2.37	0	13.22	5.19667	1.68586	7.04873
	IL-21	0.28	2.39	0	0.89	1.1	2.12	7.85	3.69	1.30656	3.63858
	IL-6	1.95	0	2.5	1.48333	1.16	0	4.96	2.04	1.31371	2.59446
	TNF	5.4	0	0	1.8	3.96	0	0	1.32	3.11769	2.28631
	24H
	48H

## Sheet: t-68V
		68V						G12V						WT
	Analyte Name	CC 24H 1	CC 24H 2	CC 24H 3	CC 48H 1	CC 48H 2	CC 48H 3	CC 24H 1	CC 24H 2	CC 24H 3	CC 48H 1	CC 48H 2	CC 48H 3	CC 24H 1	CC 24H 2	CC 24H 3	CC 48H 1	CC 48H 2	CC 48H 3
	IL-2	0.12	0	0.63	0.09	0.32	0	0	0	0	0.07	0	0	0.02	0	0	0	0	0
	IL-12p70	0	1.05	2.42	1.34	1.2	0	0	0	0	0	0	0	0.11	0	0	0	0	0
	IFN-γ	0.28	0	0.59	0.18	0	0	0	0	0	0	0	0	0.01	0	0	0	0	0
	IL-4	0	0	0.8	0.96	0	0	0	0	0	0	0	0	0	0	0	0	0	0
	IL-5	0.45	0	0.4	0	0	0	0	0	0	0	0	0	0	0	0	0	0	0
	IL-10	0.96	0	0	4.43	0	0	0.96	0	0	3.94	0	0	0	0	0	2.37	0	0
	IL-21	0.96	0	0	2.94	0	0	0.47	0	0	0.21	0	0	0.58	0.31	0	0	0	0.08
	IL-6	0.67	0	0	0	0	0	0.17	0	0.2	0	0	0	0.87	0	0.45	0	0	0
	TNF	6.52	0	5.12	0	0.47	2.59	2	0.08	0.3	0	0	0	4.59	0	0	0	0	0
		t-Test: 68V IL-2:G12V IL-2 (24H)				t-Test: 68V 12p70:G12V IL-12p70 (24H)				t-Test: 68V IFN-γ:G12V IFN-γ (24H)				t-Test: 68V IL-4:G12V IL-4 (24H)				t-Test: 68V IL-5:G12V IL-5 (24H)				t-Test: 68V IL-10:G12V IL-10 (24H)				t-Test: 68V IL-21:G12V IL-21 (24H)				t-Test: 68V IL-6:G12V IL-6 (24H)				t-Test: 68V TNF:G12V TNF (24H)
			Variable 1	Variable 2			Variable 1	Variable 2			Variable 1	Variable 2			Variable 1	Variable 2			Variable 1	Variable 2			Variable 1	Variable 2			Variable 1	Variable 2			Variable 1	Variable 2			Variable 1	Variable 2
		Mean	0.25	0		Mean	1.15667	0		Mean	0.29	0		Mean	0.266667	0		Mean	0.283333	0		Mean	0.32	0.32		Mean	0.32	0.156667		Mean	0.223333	0.123333		Mean	3.88	0.793333
		Variance	0.1119	0		Variance	1.47263	0		Variance	0.0871	0		Variance	0.213333	0		Variance	0.0608333	0		Variance	0.3072	0.3072		Variance	0.3072	0.0736333		Variance	0.149633	0.0116333		Variance	11.7808	1.10413
		Observations	3	3		Observations	3	3		Observations	3	3		Observations	3	3		Observations	3	3		Observations	3	3		Observations	3	3		Observations	3	3		Observations	3	3
		Hypothesized Mean Difference	0			Hypothesized Mean Difference	0			Hypothesized Mean Difference	0			Hypothesized Mean Difference	0			Hypothesized Mean Difference	0			Hypothesized Mean Difference	0			Hypothesized Mean Difference	0			Hypothesized Mean Difference	0			Hypothesized Mean Difference	0
		df	2			df	2			df	2			df	2			df	2			df	4			df	3			df	2			df	2
		t Stat	1.29445			t Stat	1.6509			t Stat	1.70196			t Stat	1			t Stat	1.9897			t Stat	0			t Stat	0.458425			t Stat	0.431309			t Stat	1.48939
		P(T<=t) one-tail	0.162409			P(T<=t) one-tail	0.120276			P(T<=t) one-tail	0.115436			P(T<=t) one-tail	0.211325			P(T<=t) one-tail	0.0924562			P(T<=t) one-tail	0.5			P(T<=t) one-tail	0.338909			P(T<=t) one-tail	0.354142			P(T<=t) one-tail	0.137414
		t Critical one-tail	2.91999			t Critical one-tail	2.91999			t Critical one-tail	2.91999			t Critical one-tail	2.91999			t Critical one-tail	2.91999			t Critical one-tail	2.13185			t Critical one-tail	2.35336			t Critical one-tail	2.91999			t Critical one-tail	2.91999
		P(T<=t) two-tail	0.324817			P(T<=t) two-tail	0.240551			P(T<=t) two-tail	0.230871			P(T<=t) two-tail	0.42265			P(T<=t) two-tail	0.184912			P(T<=t) two-tail	1			P(T<=t) two-tail	0.677817			P(T<=t) two-tail	0.708284			P(T<=t) two-tail	0.274828
		t Critical two-tail	4.30265			t Critical two-tail	4.30265			t Critical two-tail	4.30265			t Critical two-tail	4.30265			t Critical two-tail	4.30265			t Critical two-tail	2.77645			t Critical two-tail	3.18245			t Critical two-tail	4.30265			t Critical two-tail	4.30265
		t-Test: 68V IL-2:G12V IL-2 (48H)				t-Test: 68V 12p70:G12V IL-12p70 (48H)				t-Test: 68V IFN-γ:G12V IFN-γ (48H)				t-Test: 68V IL-4:G12V IL-4 (48H)				t-Test: 68V IL-5:G12V IL-5 (48H)				t-Test: 68V IL-10:G12V IL-10 (48H)				t-Test: 68V IL-21:G12V IL-21 (48H)				t-Test: 68V IL-6:G12V IL-6 (48H)				t-Test: 68V TNF:G12V TNF (48H)
			Variable 1	Variable 2			Variable 1	Variable 2			Variable 1	Variable 2			Variable 1	Variable 2			Variable 1	Variable 2			Variable 1	Variable 2			Variable 1	Variable 2			Variable 1	Variable 2			Variable 1	Variable 2
		Mean	0.136667	0.0233333		Mean	0.846667	0		Mean	0.06	0		Mean	0.32	0		Mean	0	0		Mean	1.47667	1.31333		Mean	0.98	1.31333		Mean	0	0		Mean	1.02	0
		Variance	0.0272333	0.00163333		Variance	0.542533	0		Variance	0.0108	0		Variance	0.3072	0		Variance	0	0		Variance	6.54163	5.17453		Variance	2.8812	5.17453		Variance	0	0		Variance	1.9039	0
		Observations	3	3		Observations	3	3		Observations	3	3		Observations	3	3		Observations	3	3		Observations	3	3		Observations	3	3		Observations	3	3		Observations	3	3
		Hypothesized Mean Difference	0			Hypothesized Mean Difference	0			Hypothesized Mean Difference	0			Hypothesized Mean Difference	0			Hypothesized Mean Difference	0			Hypothesized Mean Difference	0			Hypothesized Mean Difference	0			Hypothesized Mean Difference	0			Hypothesized Mean Difference	0
		df	2			df	2			df	2			df	2			df	65535			df	4			df	4			df	65535			df	2
		t Stat	1.15537			t Stat	1.99095			t Stat	1			t Stat	1			t Stat	65535			t Stat	0.08265			t Stat	-0.203417			t Stat	65535			t Stat	1.28038
		P(T<=t) one-tail	0.183663			P(T<=t) one-tail	0.0923704			P(T<=t) one-tail	0.211325			P(T<=t) one-tail	0.211325			P(T<=t) one-tail	#NUM!			P(T<=t) one-tail	0.46905			P(T<=t) one-tail	0.424369			P(T<=t) one-tail	#NUM!			P(T<=t) one-tail	0.16442
		t Critical one-tail	2.91999			t Critical one-tail	2.91999			t Critical one-tail	2.91999			t Critical one-tail	2.91999			t Critical one-tail	#NUM!			t Critical one-tail	2.13185			t Critical one-tail	2.13185			t Critical one-tail	#NUM!			t Critical one-tail	2.91999
		P(T<=t) two-tail	0.367326			P(T<=t) two-tail	0.184741			P(T<=t) two-tail	0.42265			P(T<=t) two-tail	0.42265			P(T<=t) two-tail	#NUM!			P(T<=t) two-tail	0.938101			P(T<=t) two-tail	0.848738			P(T<=t) two-tail	#NUM!			P(T<=t) two-tail	0.328841
		t Critical two-tail	4.30265			t Critical two-tail	4.30265			t Critical two-tail	4.30265			t Critical two-tail	4.30265			t Critical two-tail	#NUM!			t Critical two-tail	2.77645			t Critical two-tail	2.77645			t Critical two-tail	#NUM!			t Critical two-tail	4.30265
		t-Test: 68V IL-2:WT IL-2 (24H)				t-Test: 68V 12p70:WT IL-12p70 (24H)				t-Test: 68V IFN-γ:WT IFN-γ (24H)				t-Test: 68V IL-4:WT IL-4 (24H)				t-Test: 68V IL-5:WT IL-5 (24H)				t-Test: 68V IL-10:WT IL-10 (24H)				t-Test: 68V IL-21:WT IL-21 (24H)				t-Test: 68V IL-6:WT IL-6 (24H)				t-Test: 68V TNF:WT TNF (24H)
			Variable 1	Variable 2			Variable 1	Variable 2			Variable 1	Variable 2			Variable 1	Variable 2			Variable 1	Variable 2			Variable 1	Variable 2			Variable 1	Variable 2			Variable 1	Variable 2			Variable 1	Variable 2
		Mean	0.25	0.00666667		Mean	1.15667	0.0366667		Mean	0.29	0.00333333		Mean	0.266667	0		Mean	0.283333	0		Mean	0.32	0		Mean	0.32	0.296667		Mean	0.223333	0.44		Mean	3.88	1.53
		Variance	0.1119	0.000133333		Variance	1.47263	0.00403333		Variance	0.0871	3.33333e-05		Variance	0.213333	0		Variance	0.0608333	0		Variance	0.3072	0		Variance	0.3072	0.0842333		Variance	0.149633	0.1893		Variance	11.7808	7.0227
		Observations	3	3		Observations	3	3		Observations	3	3		Observations	3	3		Observations	3	3		Observations	3	3		Observations	3	3		Observations	3	3		Observations	3	3
		Hypothesized Mean Difference	0			Hypothesized Mean Difference	0			Hypothesized Mean Difference	0			Hypothesized Mean Difference	0			Hypothesized Mean Difference	0			Hypothesized Mean Difference	0			Hypothesized Mean Difference	0			Hypothesized Mean Difference	0			Hypothesized Mean Difference	0
		df	2			df	2			df	2			df	2			df	2			df	2			df	3			df	4			df	4
		t Stat	1.25918			t Stat	1.59638			t Stat	1.68208			t Stat	1			t Stat	1.9897			t Stat	1			t Stat	0.0645964			t Stat	-0.644608			t Stat	0.938662
		P(T<=t) one-tail	0.167508			P(T<=t) one-tail	0.125738			P(T<=t) one-tail	0.11729			P(T<=t) one-tail	0.211325			P(T<=t) one-tail	0.0924562			P(T<=t) one-tail	0.211325			P(T<=t) one-tail	0.476279			P(T<=t) one-tail	0.277144			P(T<=t) one-tail	0.200524
		t Critical one-tail	2.91999			t Critical one-tail	2.91999			t Critical one-tail	2.91999			t Critical one-tail	2.91999			t Critical one-tail	2.91999			t Critical one-tail	2.91999			t Critical one-tail	2.35336			t Critical one-tail	2.13185			t Critical one-tail	2.13185
		P(T<=t) two-tail	0.335016			P(T<=t) two-tail	0.251475			P(T<=t) two-tail	0.23458			P(T<=t) two-tail	0.42265			P(T<=t) two-tail	0.184912			P(T<=t) two-tail	0.42265			P(T<=t) two-tail	0.952559			P(T<=t) two-tail	0.554288			P(T<=t) two-tail	0.401049
		t Critical two-tail	4.30265			t Critical two-tail	4.30265			t Critical two-tail	4.30265			t Critical two-tail	4.30265			t Critical two-tail	4.30265			t Critical two-tail	4.30265			t Critical two-tail	3.18245			t Critical two-tail	2.77645			t Critical two-tail	2.77645
		t-Test: 68V IL-2:WT IL-2 (48H)				t-Test: 68V 12p70:WT IL-12p70 (48H)				t-Test: 68V IFN-γ:WT IFN-γ (48H)				t-Test: 68V IL-4:WT IL-4 (48H)				t-Test: 68V IL-5:WT IL-5 (48H)				t-Test: 68V IL-10:WT IL-10 (48H)				t-Test: 68V IL-21:WT IL-21 (48H)				t-Test: 68V IL-6:WT IL-6 (48H)				t-Test: 68V TNF:WT TNF (48H)
			Variable 1	Variable 2			Variable 1	Variable 2			Variable 1	Variable 2			Variable 1	Variable 2			Variable 1	Variable 2			Variable 1	Variable 2			Variable 1	Variable 2			Variable 1	Variable 2			Variable 1	Variable 2
		Mean	0.136667	0		Mean	0.846667	0		Mean	0.06	0		Mean	0.32	0		Mean	0	0		Mean	1.47667	0.79		Mean	0.98	0.0266667		Mean	0	0		Mean	1.02	0
		Variance	0.0272333	0		Variance	0.542533	0		Variance	0.0108	0		Variance	0.3072	0		Variance	0	0		Variance	6.54163	1.8723		Variance	2.8812	0.00213333		Variance	0	0		Variance	1.9039	0
		Observations	3	3		Observations	3	3		Observations	3	3		Observations	3	3		Observations	3	3		Observations	3	3		Observations	3	3		Observations	3	3		Observations	3	3
		Hypothesized Mean Difference	0			Hypothesized Mean Difference	0			Hypothesized Mean Difference	0			Hypothesized Mean Difference	0			Hypothesized Mean Difference	0			Hypothesized Mean Difference	0			Hypothesized Mean Difference	0			Hypothesized Mean Difference	0			Hypothesized Mean Difference	0
		df	2			df	2			df	2			df	2			df	65535			df	3			df	2			df	65535			df	2
		t Stat	1.43441			t Stat	1.99095			t Stat	1			t Stat	1			t Stat	65535			t Stat	0.410022			t Stat	0.972429			t Stat	65535			t Stat	1.28038
		P(T<=t) one-tail	0.143949			P(T<=t) one-tail	0.0923704			P(T<=t) one-tail	0.211325			P(T<=t) one-tail	0.211325			P(T<=t) one-tail	#NUM!			P(T<=t) one-tail	0.354656			P(T<=t) one-tail	0.216704			P(T<=t) one-tail	#NUM!			P(T<=t) one-tail	0.16442
		t Critical one-tail	2.91999			t Critical one-tail	2.91999			t Critical one-tail	2.91999			t Critical one-tail	2.91999			t Critical one-tail	#NUM!			t Critical one-tail	2.35336			t Critical one-tail	2.91999			t Critical one-tail	#NUM!			t Critical one-tail	2.91999
		P(T<=t) two-tail	0.287898			P(T<=t) two-tail	0.184741			P(T<=t) two-tail	0.42265			P(T<=t) two-tail	0.42265			P(T<=t) two-tail	#NUM!			P(T<=t) two-tail	0.709312			P(T<=t) two-tail	0.433409			P(T<=t) two-tail	#NUM!			P(T<=t) two-tail	0.328841
		t Critical two-tail	4.30265			t Critical two-tail	4.30265			t Critical two-tail	4.30265			t Critical two-tail	4.30265			t Critical two-tail	#NUM!			t Critical two-tail	3.18245			t Critical two-tail	4.30265			t Critical two-tail	#NUM!			t Critical two-tail	4.30265

## Sheet: t-164D
		164D						G13D						WT
	Analyte Name	CC 24H 1	CC 24H 2	CC 24H 3	CC 48H 1	CC 48H 2	CC 48H 3	CC 24H 1	CC 24H 2	CC 24H 3	CC 48H 1	CC 48H 2	CC 48H 3	CC 24H 1	CC 24H 2	CC 24H 3	CC 48H 1	CC 48H 2	CC 48H 3
	IL-2	0.23	0.59	0.86	0.04	0	0.28	0	0	0	0	0	0	0.02	0	0	0	0	0
	IL-12p70	0	0	4.42	0.47	0	0	0	2.58	0	0	0	0	0.11	0	0	0	0	0
	IFN-γ	0	0.31	0.9	0	0	0.15	0	0	0	0	0	0	0.01	0	0	0	0	0
	IL-4	0	0.56	1.25	0	0	0.42	0	0	0	0	0	0	0	0	0	0	0	0
	IL-5	0	0.45	0.8	0	0	0	0	0	0	0	0	0	0	0	0	0	0	0
	IL-10	3.15	2.24	3.39	2.05	0	0	0	0	0	0.96	0	0	0	0	0	2.37	0	0
	IL-21	0.34	0.34	0.86	1.11	0.51	0	1.18	0	0	0.23	0	0	0.58	0.31	0	0	0	0.08
	IL-6	0.97	0	0	0	0	0	0.37	0	0.43	0	0	0	0.87	0	0.45	0	0	0
	TNF	2	1.96	4.89	0	0.97	1.22	1.89	0	0	0	0	0	4.59	0	0	0	0	0
		t-Test: 164D IL-2:G13D IL-2 (24H)				t-Test: 164D 12p70:G13D IL-12p70 (24H)				t-Test: 164D IFN-γ:G13D IFN-γ (24H)				t-Test: 164D IL-4:G13D IL-4 (24H)				t-Test: 164D IL-5:G13D IL-5 (24H)				t-Test: 164D IL-10:G13D IL-10 (24H)				t-Test: 164D IL-21:G13D IL-21 (24H)				t-Test: 164D IL-6:G13D IL-6 (24H)				t-Test: 164D TNF:G13D TNF (24H)
			Variable 1	Variable 2			Variable 1	Variable 2			Variable 1	Variable 2			Variable 1	Variable 2			Variable 1	Variable 2			Variable 1	Variable 2			Variable 1	Variable 2			Variable 1	Variable 2			Variable 1	Variable 2
		Mean	0.56	0		Mean	1.47333	0.86		Mean	0.403333	0		Mean	0.603333	0		Mean	0.416667	0		Mean	2.92667	0		Mean	0.513333	0.393333		Mean	0.323333	0.266667		Mean	2.95	0.63
		Variance	0.0999	0		Variance	6.51213	2.2188		Variance	0.209033	0		Variance	0.392033	0		Variance	0.160833	0		Variance	0.368033	0		Variance	0.0901333	0.464133		Variance	0.313633	0.0542333		Variance	2.8231	1.1907
		Observations	3	3		Observations	3	3		Observations	3	3		Observations	3	3		Observations	3	3		Observations	3	3		Observations	3	3		Observations	3	3		Observations	3	3
		Hypothesized Mean Difference	0			Hypothesized Mean Difference	0			Hypothesized Mean Difference	0			Hypothesized Mean Difference	0			Hypothesized Mean Difference	0			Hypothesized Mean Difference	0			Hypothesized Mean Difference	0			Hypothesized Mean Difference	0			Hypothesized Mean Difference	0
		df	2			df	3			df	2			df	2			df	2			df	2			df	3			df	3			df	3
		t Stat	3.06878			t Stat	0.359523			t Stat	1.52798			t Stat	1.669			t Stat	1.79954			t Stat	8.35584			t Stat	0.279179			t Stat	0.161824			t Stat	2.00572
		P(T<=t) one-tail	0.0458995			P(T<=t) one-tail	0.371511			P(T<=t) one-tail	0.13305			P(T<=t) one-tail	0.11853			P(T<=t) one-tail	0.106872			P(T<=t) one-tail	0.00701099			P(T<=t) one-tail	0.399124			P(T<=t) one-tail	0.440865			P(T<=t) one-tail	0.069278
		t Critical one-tail	2.91999			t Critical one-tail	2.35336			t Critical one-tail	2.91999			t Critical one-tail	2.91999			t Critical one-tail	2.91999			t Critical one-tail	2.91999			t Critical one-tail	2.35336			t Critical one-tail	2.35336			t Critical one-tail	2.35336
		P(T<=t) two-tail	0.091799			P(T<=t) two-tail	0.743021			P(T<=t) two-tail	0.2661			P(T<=t) two-tail	0.237061			P(T<=t) two-tail	0.213743			P(T<=t) two-tail	0.014022			P(T<=t) two-tail	0.798248			P(T<=t) two-tail	0.881729			P(T<=t) two-tail	0.138556
		t Critical two-tail	4.30265			t Critical two-tail	3.18245			t Critical two-tail	4.30265			t Critical two-tail	4.30265			t Critical two-tail	4.30265			t Critical two-tail	4.30265			t Critical two-tail	3.18245			t Critical two-tail	3.18245			t Critical two-tail	3.18245
		t-Test: 164D IL-2:G13D IL-2 (48H)				t-Test: 164D 12p70:G13D IL-12p70 (48H)				t-Test: 164D IFN-γ:G13D IFN-γ (48H)				t-Test: 164D IL-4:G13D IL-4 (48H)				t-Test: 164D IL-5:G13D IL-5 (48H)				t-Test: 164D IL-10:G13D IL-10 (48H)				t-Test: 164D IL-21:G13D IL-21 (48H)				t-Test: 164D IL-6:G13D IL-6 (48H)				t-Test: 164D TNF:G13D TNF (48H)
			Variable 1	Variable 2			Variable 1	Variable 2			Variable 1	Variable 2			Variable 1	Variable 2			Variable 1	Variable 2			Variable 1	Variable 2			Variable 1	Variable 2			Variable 1	Variable 2			Variable 1	Variable 2
		Mean	0.106667	0		Mean	0.156667	0		Mean	0.05	0		Mean	0.14	0		Mean	0	0		Mean	0.683333	0.32		Mean	0.54	0.0766667		Mean	0	0		Mean	0.73	0
		Variance	0.0229333	0		Variance	0.0736333	0		Variance	0.0075	0		Variance	0.0588	0		Variance	0	0		Variance	1.40083	0.3072		Variance	0.3087	0.0176333		Variance	0	0		Variance	0.4153	0
		Observations	3	3		Observations	3	3		Observations	3	3		Observations	3	3		Observations	3	3		Observations	3	3		Observations	3	3		Observations	3	3		Observations	3	3
		Hypothesized Mean Difference	0			Hypothesized Mean Difference	0			Hypothesized Mean Difference	0			Hypothesized Mean Difference	0			Hypothesized Mean Difference	0			Hypothesized Mean Difference	0			Hypothesized Mean Difference	0			Hypothesized Mean Difference	0			Hypothesized Mean Difference	0
		df	2			df	2			df	2			df	2			df	65535			df	3			df	2			df	65535			df	2
		t Stat	1.21999			t Stat	1			t Stat	1			t Stat	1			t Stat	65535			t Stat	0.481524			t Stat	1.40483			t Stat	65535			t Stat	1.96202
		P(T<=t) one-tail	0.173401			P(T<=t) one-tail	0.211325			P(T<=t) one-tail	0.211325			P(T<=t) one-tail	0.211325			P(T<=t) one-tail	#NUM!			P(T<=t) one-tail	0.331543			P(T<=t) one-tail	0.147626			P(T<=t) one-tail	#NUM!			P(T<=t) one-tail	0.094386
		t Critical one-tail	2.91999			t Critical one-tail	2.91999			t Critical one-tail	2.91999			t Critical one-tail	2.91999			t Critical one-tail	#NUM!			t Critical one-tail	2.35336			t Critical one-tail	2.91999			t Critical one-tail	#NUM!			t Critical one-tail	2.91999
		P(T<=t) two-tail	0.346803			P(T<=t) two-tail	0.42265			P(T<=t) two-tail	0.42265			P(T<=t) two-tail	0.42265			P(T<=t) two-tail	#NUM!			P(T<=t) two-tail	0.663086			P(T<=t) two-tail	0.295251			P(T<=t) two-tail	#NUM!			P(T<=t) two-tail	0.188772
		t Critical two-tail	4.30265			t Critical two-tail	4.30265			t Critical two-tail	4.30265			t Critical two-tail	4.30265			t Critical two-tail	#NUM!			t Critical two-tail	3.18245			t Critical two-tail	4.30265			t Critical two-tail	#NUM!			t Critical two-tail	4.30265
		t-Test: 164D IL-2:WT IL-2 (24H)				t-Test: 164D 12p70:WT IL-12p70 (24H)				t-Test: 164D IFN-γ:WT IFN-γ (24H)				t-Test: 164D IL-4:WT IL-4 (24H)				t-Test: 164D IL-5:WT IL-5 (24H)				t-Test: 164D IL-10:WT IL-10 (24H)				t-Test: 164D IL-21:WT IL-21 (24H)				t-Test: 164D IL-6:WT IL-6 (24H)				t-Test: 164D TNF:WT TNF (24H)
			Variable 1	Variable 2			Variable 1	Variable 2			Variable 1	Variable 2			Variable 1	Variable 2			Variable 1	Variable 2			Variable 1	Variable 2			Variable 1	Variable 2			Variable 1	Variable 2			Variable 1	Variable 2
		Mean	0.56	0.00666667		Mean	1.47333	0.0366667		Mean	0.403333	0.00333333		Mean	0.603333	0		Mean	0.416667	0		Mean	2.92667	0		Mean	0.513333	0.296667		Mean	0.323333	0.44		Mean	2.95	1.53
		Variance	0.0999	0.000133333		Variance	6.51213	0.00403333		Variance	0.209033	3.33333e-05		Variance	0.392033	0		Variance	0.160833	0		Variance	0.368033	0		Variance	0.0901333	0.0842333		Variance	0.313633	0.1893		Variance	2.8231	7.0227
		Observations	3	3		Observations	3	3		Observations	3	3		Observations	3	3		Observations	3	3		Observations	3	3		Observations	3	3		Observations	3	3		Observations	3	3
		Hypothesized Mean Difference	0			Hypothesized Mean Difference	0			Hypothesized Mean Difference	0			Hypothesized Mean Difference	0			Hypothesized Mean Difference	0			Hypothesized Mean Difference	0			Hypothesized Mean Difference	0			Hypothesized Mean Difference	0			Hypothesized Mean Difference	0
		df	2			df	2			df	2			df	2			df	2			df	2			df	4			df	4			df	3
		t Stat	3.03023			t Stat	0.974811			t Stat	1.51523			t Stat	1.669			t Stat	1.79954			t Stat	8.35584			t Stat	0.898713			t Stat	-0.284939			t Stat	0.783833
		P(T<=t) one-tail	0.0469146			P(T<=t) one-tail	0.216234			P(T<=t) one-tail	0.134472			P(T<=t) one-tail	0.11853			P(T<=t) one-tail	0.106872			P(T<=t) one-tail	0.00701099			P(T<=t) one-tail	0.209807			P(T<=t) one-tail	0.394917			P(T<=t) one-tail	0.245165
		t Critical one-tail	2.91999			t Critical one-tail	2.91999			t Critical one-tail	2.91999			t Critical one-tail	2.91999			t Critical one-tail	2.91999			t Critical one-tail	2.91999			t Critical one-tail	2.13185			t Critical one-tail	2.13185			t Critical one-tail	2.35336
		P(T<=t) two-tail	0.0938292			P(T<=t) two-tail	0.432468			P(T<=t) two-tail	0.268945			P(T<=t) two-tail	0.237061			P(T<=t) two-tail	0.213743			P(T<=t) two-tail	0.014022			P(T<=t) two-tail	0.419615			P(T<=t) two-tail	0.789835			P(T<=t) two-tail	0.490329
		t Critical two-tail	4.30265			t Critical two-tail	4.30265			t Critical two-tail	4.30265			t Critical two-tail	4.30265			t Critical two-tail	4.30265			t Critical two-tail	4.30265			t Critical two-tail	2.77645			t Critical two-tail	2.77645			t Critical two-tail	3.18245
		t-Test: 164D IL-2:WT IL-2 (48H)				t-Test: 164D 12p70:WT IL-12p70 (48H)				t-Test: 164D IFN-γ:WT IFN-γ (48H)				t-Test: 164D IL-4:WT IL-4 (48H)				t-Test: 164D IL-5:WT IL-5 (48H)				t-Test: 164D IL-10:WT IL-10 (48H)				t-Test: 164D IL-21:WT IL-21 (48H)				t-Test: 164D IL-6:WT IL-6 (48H)				t-Test: 164D TNF:WT TNF (48H)
			Variable 1	Variable 2			Variable 1	Variable 2			Variable 1	Variable 2			Variable 1	Variable 2			Variable 1	Variable 2			Variable 1	Variable 2			Variable 1	Variable 2			Variable 1	Variable 2			Variable 1	Variable 2
		Mean	0.106667	0		Mean	0.156667	0		Mean	0.05	0		Mean	0.14	0		Mean	0	0		Mean	0.683333	0.79		Mean	0.54	0.0266667		Mean	0	0		Mean	0.73	0
		Variance	0.0229333	0		Variance	0.0736333	0		Variance	0.0075	0		Variance	0.0588	0		Variance	0	0		Variance	1.40083	1.8723		Variance	0.3087	0.00213333		Variance	0	0		Variance	0.4153	0
		Observations	3	3		Observations	3	3		Observations	3	3		Observations	3	3		Observations	3	3		Observations	3	3		Observations	3	3		Observations	3	3		Observations	3	3
		Hypothesized Mean Difference	0			Hypothesized Mean Difference	0			Hypothesized Mean Difference	0			Hypothesized Mean Difference	0			Hypothesized Mean Difference	0			Hypothesized Mean Difference	0			Hypothesized Mean Difference	0			Hypothesized Mean Difference	0			Hypothesized Mean Difference	0
		df	2			df	2			df	2			df	2			df	65535			df	4			df	2			df	65535			df	2
		t Stat	1.21999			t Stat	1			t Stat	1			t Stat	1			t Stat	65535			t Stat	-0.102119			t Stat	1.59476			t Stat	65535			t Stat	1.96202
		P(T<=t) one-tail	0.173401			P(T<=t) one-tail	0.211325			P(T<=t) one-tail	0.211325			P(T<=t) one-tail	0.211325			P(T<=t) one-tail	#NUM!			P(T<=t) one-tail	0.461788			P(T<=t) one-tail	0.125905			P(T<=t) one-tail	#NUM!			P(T<=t) one-tail	0.094386
		t Critical one-tail	2.91999			t Critical one-tail	2.91999			t Critical one-tail	2.91999			t Critical one-tail	2.91999			t Critical one-tail	#NUM!			t Critical one-tail	2.13185			t Critical one-tail	2.91999			t Critical one-tail	#NUM!			t Critical one-tail	2.91999
		P(T<=t) two-tail	0.346803			P(T<=t) two-tail	0.42265			P(T<=t) two-tail	0.42265			P(T<=t) two-tail	0.42265			P(T<=t) two-tail	#NUM!			P(T<=t) two-tail	0.923577			P(T<=t) two-tail	0.25181			P(T<=t) two-tail	#NUM!			P(T<=t) two-tail	0.188772
		t Critical two-tail	4.30265			t Critical two-tail	4.30265			t Critical two-tail	4.30265			t Critical two-tail	4.30265			t Critical two-tail	#NUM!			t Critical two-tail	2.77645			t Critical two-tail	4.30265			t Critical two-tail	#NUM!			t Critical two-tail	4.30265

## Sheet: t-224D
		224D						G13D						WT
	Analyte Name	CC 24H 1	CC 24H 2	CC 24H 3	CC 48H 1	CC 48H 2	CC 48H 3	CC 24H 1	CC 24H 2	CC 24H 3	CC 48H 1	CC 48H 2	CC 48H 3	CC 24H 1	CC 24H 2	CC 24H 3	CC 48H 1	CC 48H 2	CC 48H 3
	IL-2	0.17	0	0	0.24	0	0.79	0	0	0	0	0	0	0.02	0	0	0	0	0
	IL-12p70	0	0	0	0	0.52	10.92	0	2.58	0	0	0	0	0.11	0	0	0	0	0
	IFN-γ	0	0	0	0.16	0	2.79	0	0	0	0	0	0	0.01	0	0	0	0	0
	IL-4	0	0	0	0	0	7.39	0	0	0	0	0	0	0	0	0	0	0	0
	IL-5	0	0	0	0	0	3.39	0	0	0	0	0	0	0	0	0	0	0	0
	IL-10	2.92	0	0	2.37	0	13.22	0	0	0	0.96	0	0	0	0	0	2.37	0	0
	IL-21	0.28	2.39	0	1.1	2.12	7.85	1.18	0	0	0.23	0	0	0.58	0.31	0	0	0	0.08
	IL-6	1.95	0	2.5	1.16	0	4.96	0.37	0	0.43	0	0	0	0.87	0	0.45	0	0	0
	TNF	5.4	0	0	3.96	0	0	1.89	0	0	0	0	0	4.59	0	0	0	0	0
		t-Test: 224D IL-2:G13D IL-2 (24H)				t-Test: 224D 12p70:G13D IL-12p70 (24H)				t-Test: 224D IFN-γ:G13D IFN-γ (24H)				t-Test: 224D IL-4:G13D IL-4 (24H)				t-Test: 224D IL-5:G13D IL-5 (24H)				t-Test: 224D IL-10:G13D IL-10 (24H)				t-Test: 224D IL-21:G13D IL-21 (24H)				t-Test: 224D IL-6:G13D IL-6 (24H)				t-Test: 224D TNF:G13D TNF (24H)
			Variable 1	Variable 2			Variable 1	Variable 2			Variable 1	Variable 2			Variable 1	Variable 2			Variable 1	Variable 2			Variable 1	Variable 2			Variable 1	Variable 2			Variable 1	Variable 2			Variable 1	Variable 2
		Mean	0.0566667	0		Mean	0	0.86		Mean	0	0		Mean	0	0		Mean	0	0		Mean	0.973333	0		Mean	0.89	0.393333		Mean	1.48333	0.266667		Mean	1.8	0.63
		Variance	0.00963333	0		Variance	0	2.2188		Variance	0	0		Variance	0	0		Variance	0	0		Variance	2.84213	0		Variance	1.7071	0.464133		Variance	1.72583	0.0542333		Variance	9.72	1.1907
		Observations	3	3		Observations	3	3		Observations	3	3		Observations	3	3		Observations	3	3		Observations	3	3		Observations	3	3		Observations	3	3		Observations	3	3
		Hypothesized Mean Difference	0			Hypothesized Mean Difference	0			Hypothesized Mean Difference	0			Hypothesized Mean Difference	0			Hypothesized Mean Difference	0			Hypothesized Mean Difference	0			Hypothesized Mean Difference	0			Hypothesized Mean Difference	0			Hypothesized Mean Difference	0
		df	2			df	2			df	65535			df	65535			df	65535			df	2			df	3			df	2			df	2
		t Stat	1			t Stat	-1			t Stat	65535			t Stat	65535			t Stat	65535			t Stat	1			t Stat	0.583811			t Stat	1.57948			t Stat	0.613508
		P(T<=t) one-tail	0.211325			P(T<=t) one-tail	0.211325			P(T<=t) one-tail	#NUM!			P(T<=t) one-tail	#NUM!			P(T<=t) one-tail	#NUM!			P(T<=t) one-tail	0.211325			P(T<=t) one-tail	0.300171			P(T<=t) one-tail	0.127496			P(T<=t) one-tail	0.30101
		t Critical one-tail	2.91999			t Critical one-tail	2.91999			t Critical one-tail	#NUM!			t Critical one-tail	#NUM!			t Critical one-tail	#NUM!			t Critical one-tail	2.91999			t Critical one-tail	2.35336			t Critical one-tail	2.91999			t Critical one-tail	2.91999
		P(T<=t) two-tail	0.42265			P(T<=t) two-tail	0.42265			P(T<=t) two-tail	#NUM!			P(T<=t) two-tail	#NUM!			P(T<=t) two-tail	#NUM!			P(T<=t) two-tail	0.42265			P(T<=t) two-tail	0.600343			P(T<=t) two-tail	0.254992			P(T<=t) two-tail	0.60202
		t Critical two-tail	4.30265			t Critical two-tail	4.30265			t Critical two-tail	#NUM!			t Critical two-tail	#NUM!			t Critical two-tail	#NUM!			t Critical two-tail	4.30265			t Critical two-tail	3.18245			t Critical two-tail	4.30265			t Critical two-tail	4.30265
		t-Test: 224D IL-2:G13D IL-2 (48H)				t-Test: 224D 12p70:G13D IL-12p70 (48H)				t-Test: 224D IFN-γ:G13D IFN-γ (48H)				t-Test: 224D IL-4:G13D IL-4 (48H)				t-Test: 224D IL-5:G13D IL-5 (48H)				t-Test: 224D IL-10:G13D IL-10 (48H)				t-Test: 224D IL-21:G13D IL-21 (48H)				t-Test: 224D IL-6:G13D IL-6 (48H)				t-Test: 224D TNF:G13D TNF (48H)
			Variable 1	Variable 2			Variable 1	Variable 2			Variable 1	Variable 2			Variable 1	Variable 2			Variable 1	Variable 2			Variable 1	Variable 2			Variable 1	Variable 2			Variable 1	Variable 2			Variable 1	Variable 2
		Mean	0.343333	0		Mean	3.81333	0		Mean	0.983333	0		Mean	2.46333	0		Mean	1.13	0		Mean	5.19667	0.32		Mean	3.69	0.0766667		Mean	2.04	0		Mean	1.32	0
		Variance	0.164033	0		Variance	37.9461	0		Variance	2.45443	0		Variance	18.204	0		Variance	3.8307	0		Variance	49.6846	0.3072		Variance	13.2393	0.0176333		Variance	6.7312	0		Variance	5.2272	0
		Observations	3	3		Observations	3	3		Observations	3	3		Observations	3	3		Observations	3	3		Observations	3	3		Observations	3	3		Observations	3	3		Observations	3	3
		Hypothesized Mean Difference	0			Hypothesized Mean Difference	0			Hypothesized Mean Difference	0			Hypothesized Mean Difference	0			Hypothesized Mean Difference	0			Hypothesized Mean Difference	0			Hypothesized Mean Difference	0			Hypothesized Mean Difference	0			Hypothesized Mean Difference	0
		df	2			df	2			df	2			df	2			df	2			df	2			df	2			df	2			df	2
		t Stat	1.46829			t Stat	1.07221			t Stat	1.08714			t Stat	1			t Stat	1			t Stat	1.19463			t Stat	1.71889			t Stat	1.3619			t Stat	1
		P(T<=t) one-tail	0.139878			P(T<=t) one-tail	0.197921			P(T<=t) one-tail	0.195271			P(T<=t) one-tail	0.211325			P(T<=t) one-tail	0.211325			P(T<=t) one-tail	0.177345			P(T<=t) one-tail	0.113887			P(T<=t) one-tail	0.153171			P(T<=t) one-tail	0.211325
		t Critical one-tail	2.91999			t Critical one-tail	2.91999			t Critical one-tail	2.91999			t Critical one-tail	2.91999			t Critical one-tail	2.91999			t Critical one-tail	2.91999			t Critical one-tail	2.91999			t Critical one-tail	2.91999			t Critical one-tail	2.91999
		P(T<=t) two-tail	0.279756			P(T<=t) two-tail	0.395841			P(T<=t) two-tail	0.390541			P(T<=t) two-tail	0.42265			P(T<=t) two-tail	0.42265			P(T<=t) two-tail	0.354691			P(T<=t) two-tail	0.227774			P(T<=t) two-tail	0.306342			P(T<=t) two-tail	0.42265
		t Critical two-tail	4.30265			t Critical two-tail	4.30265			t Critical two-tail	4.30265			t Critical two-tail	4.30265			t Critical two-tail	4.30265			t Critical two-tail	4.30265			t Critical two-tail	4.30265			t Critical two-tail	4.30265			t Critical two-tail	4.30265
		t-Test: 224D IL-2:WT IL-2 (24H)				t-Test: 224D 12p70:WT IL-12p70 (24H)				t-Test: 224D IFN-γ:WT IFN-γ (24H)				t-Test: 224D IL-4:WT IL-4 (24H)				t-Test: 224D IL-5:WT IL-5 (24H)				t-Test: 224D IL-10:WT IL-10 (24H)				t-Test: 224D IL-21:WT IL-21 (24H)				t-Test: 224D IL-6:WT IL-6 (24H)				t-Test: 224D TNF:WT TNF (24H)
			Variable 1	Variable 2			Variable 1	Variable 2			Variable 1	Variable 2			Variable 1	Variable 2			Variable 1	Variable 2			Variable 1	Variable 2			Variable 1	Variable 2			Variable 1	Variable 2			Variable 1	Variable 2
		Mean	0.0566667	0.00666667		Mean	0	0.0366667		Mean	0	0.00333333		Mean	0	0		Mean	0	0		Mean	0.973333	0		Mean	0.89	0.296667		Mean	1.48333	0.44		Mean	1.8	1.53
		Variance	0.00963333	0.000133333		Variance	0	0.00403333		Variance	0	3.33333e-05		Variance	0	0		Variance	0	0		Variance	2.84213	0		Variance	1.7071	0.0842333		Variance	1.72583	0.1893		Variance	9.72	7.0227
		Observations	3	3		Observations	3	3		Observations	3	3		Observations	3	3		Observations	3	3		Observations	3	3		Observations	3	3		Observations	3	3		Observations	3	3
		Hypothesized Mean Difference	0			Hypothesized Mean Difference	0			Hypothesized Mean Difference	0			Hypothesized Mean Difference	0			Hypothesized Mean Difference	0			Hypothesized Mean Difference	0			Hypothesized Mean Difference	0			Hypothesized Mean Difference	0			Hypothesized Mean Difference	0
		df	2			df	2			df	2			df	65535			df	65535			df	2			df	2			df	2			df	4
		t Stat	0.876309			t Stat	-1			t Stat	-1			t Stat	65535			t Stat	65535			t Stat	1			t Stat	0.767841			t Stat	1.30582			t Stat	0.114291
		P(T<=t) one-tail	0.236639			P(T<=t) one-tail	0.211325			P(T<=t) one-tail	0.211325			P(T<=t) one-tail	#NUM!			P(T<=t) one-tail	#NUM!			P(T<=t) one-tail	0.211325			P(T<=t) one-tail	0.261424			P(T<=t) one-tail	0.160805			P(T<=t) one-tail	0.457257
		t Critical one-tail	2.91999			t Critical one-tail	2.91999			t Critical one-tail	2.91999			t Critical one-tail	#NUM!			t Critical one-tail	#NUM!			t Critical one-tail	2.91999			t Critical one-tail	2.91999			t Critical one-tail	2.91999			t Critical one-tail	2.13185
		P(T<=t) two-tail	0.473279			P(T<=t) two-tail	0.42265			P(T<=t) two-tail	0.42265			P(T<=t) two-tail	#NUM!			P(T<=t) two-tail	#NUM!			P(T<=t) two-tail	0.42265			P(T<=t) two-tail	0.522848			P(T<=t) two-tail	0.321609			P(T<=t) two-tail	0.914514
		t Critical two-tail	4.30265			t Critical two-tail	4.30265			t Critical two-tail	4.30265			t Critical two-tail	#NUM!			t Critical two-tail	#NUM!			t Critical two-tail	4.30265			t Critical two-tail	4.30265			t Critical two-tail	4.30265			t Critical two-tail	2.77645
		t-Test: 224D IL-2:WT IL-2 (48H)				t-Test: 224D 12p70:WT IL-12p70 (48H)				t-Test: 224D IFN-γ:WT IFN-γ (48H)				t-Test: 224D IL-4:WT IL-4 (48H)				t-Test: 224D IL-5:WT IL-5 (48H)				t-Test: 224D IL-10:WT IL-10 (48H)				t-Test: 224D IL-21:WT IL-21 (48H)				t-Test: 224D IL-6:WT IL-6 (48H)				t-Test: 224D TNF:WT TNF (48H)
			Variable 1	Variable 2			Variable 1	Variable 2			Variable 1	Variable 2			Variable 1	Variable 2			Variable 1	Variable 2			Variable 1	Variable 2			Variable 1	Variable 2			Variable 1	Variable 2			Variable 1	Variable 2
		Mean	0.343333	0		Mean	3.81333	0		Mean	0.983333	0		Mean	2.46333	0		Mean	1.13	0		Mean	5.19667	0.79		Mean	3.69	0.0266667		Mean	2.04	0		Mean	1.32	0
		Variance	0.164033	0		Variance	37.9461	0		Variance	2.45443	0		Variance	18.204	0		Variance	3.8307	0		Variance	49.6846	1.8723		Variance	13.2393	0.00213333		Variance	6.7312	0		Variance	5.2272	0
		Observations	3	3		Observations	3	3		Observations	3	3		Observations	3	3		Observations	3	3		Observations	3	3		Observations	3	3		Observations	3	3		Observations	3	3
		Hypothesized Mean Difference	0			Hypothesized Mean Difference	0			Hypothesized Mean Difference	0			Hypothesized Mean Difference	0			Hypothesized Mean Difference	0			Hypothesized Mean Difference	0			Hypothesized Mean Difference	0			Hypothesized Mean Difference	0			Hypothesized Mean Difference	0
		df	2			df	2			df	2			df	2			df	2			df	2			df	2			df	2			df	2
		t Stat	1.46829			t Stat	1.07221			t Stat	1.08714			t Stat	1			t Stat	1			t Stat	1.06299			t Stat	1.74369			t Stat	1.3619			t Stat	1
		P(T<=t) one-tail	0.139878			P(T<=t) one-tail	0.197921			P(T<=t) one-tail	0.195271			P(T<=t) one-tail	0.211325			P(T<=t) one-tail	0.211325			P(T<=t) one-tail	0.19958			P(T<=t) one-tail	0.111667			P(T<=t) one-tail	0.153171			P(T<=t) one-tail	0.211325
		t Critical one-tail	2.91999			t Critical one-tail	2.91999			t Critical one-tail	2.91999			t Critical one-tail	2.91999			t Critical one-tail	2.91999			t Critical one-tail	2.91999			t Critical one-tail	2.91999			t Critical one-tail	2.91999			t Critical one-tail	2.91999
		P(T<=t) two-tail	0.279756			P(T<=t) two-tail	0.395841			P(T<=t) two-tail	0.390541			P(T<=t) two-tail	0.42265			P(T<=t) two-tail	0.42265			P(T<=t) two-tail	0.399159			P(T<=t) two-tail	0.223334			P(T<=t) two-tail	0.306342			P(T<=t) two-tail	0.42265
		t Critical two-tail	4.30265			t Critical two-tail	4.30265			t Critical two-tail	4.30265			t Critical two-tail	4.30265			t Critical two-tail	4.30265			t Critical two-tail	4.30265			t Critical two-tail	4.30265			t Critical two-tail	4.30265			t Critical two-tail	4.30265

[truncated: 12 more sheets: th1, th2, th17, Pro-I, IL-12p70, IL-4, IL-5, IL-10, IL-21, TNF-alpha, IL-2, IFN-gamma]
